# Supplementary material for: Fabrication of High-Performance Colorimetric Membrane by Incorporation of Polydiacetylene into Polyarylene Ether Nitriles Electrospinning Nanofibrous Membranes
Source: MDPI journal article supplement (doi:10.3390/nano12244379), 2022-12-08
Supplement: s1 [file s1]

*Supplementary Materials*

**Fabrication of High-Performance Colorimetric Membrane by Incorporation of Polydiacetylene into Polyarylene Ether Nitriles Electrospinning Nanofibrous Membranes**

Pan Wang <sup>1,\*</sup>, Xidi Liu <sup>1</sup>, Yong You <sup>2</sup>, Mengxue Wang <sup>1</sup>, Yumin Huang <sup>3</sup>, Ying Li <sup>1</sup>, Kui Li <sup>1</sup>, Yuxin Yang <sup>1</sup>, Wei Feng <sup>1</sup>, Qiancheng Liu <sup>4</sup>, Jiaqi Chen <sup>1,\*</sup> and Xulin Yang <sup>1,\*</sup>

<sup>1</sup> School of Mechanical Engineering, Chengdu University, Chengdu 610106, China

<sup>2</sup> Key Laboratory of General Chemistry of the National Ethnic Affairs Commission, School of Chemistry and Environment, Southwest Minzu University, Chengdu 610041, China

<sup>3</sup> Research Branch of Advanced Functional Materials, School of Materials and Energy, University of Electronic Science and Technology of China, Chengdu 610054, China

<sup>4</sup> Institute for Advanced Materials Deformation and Damage from Multi-Scale, Chengdu University, Chengdu 610106, China

\* Correspondence: wangpan@cdu.edu.cn (P.W.); jiaqichen2014@163.com (J.C.); yangxulin@cdu.edu.cn (X.Y.); Tel.: +86-028-84616169 (P.W.)

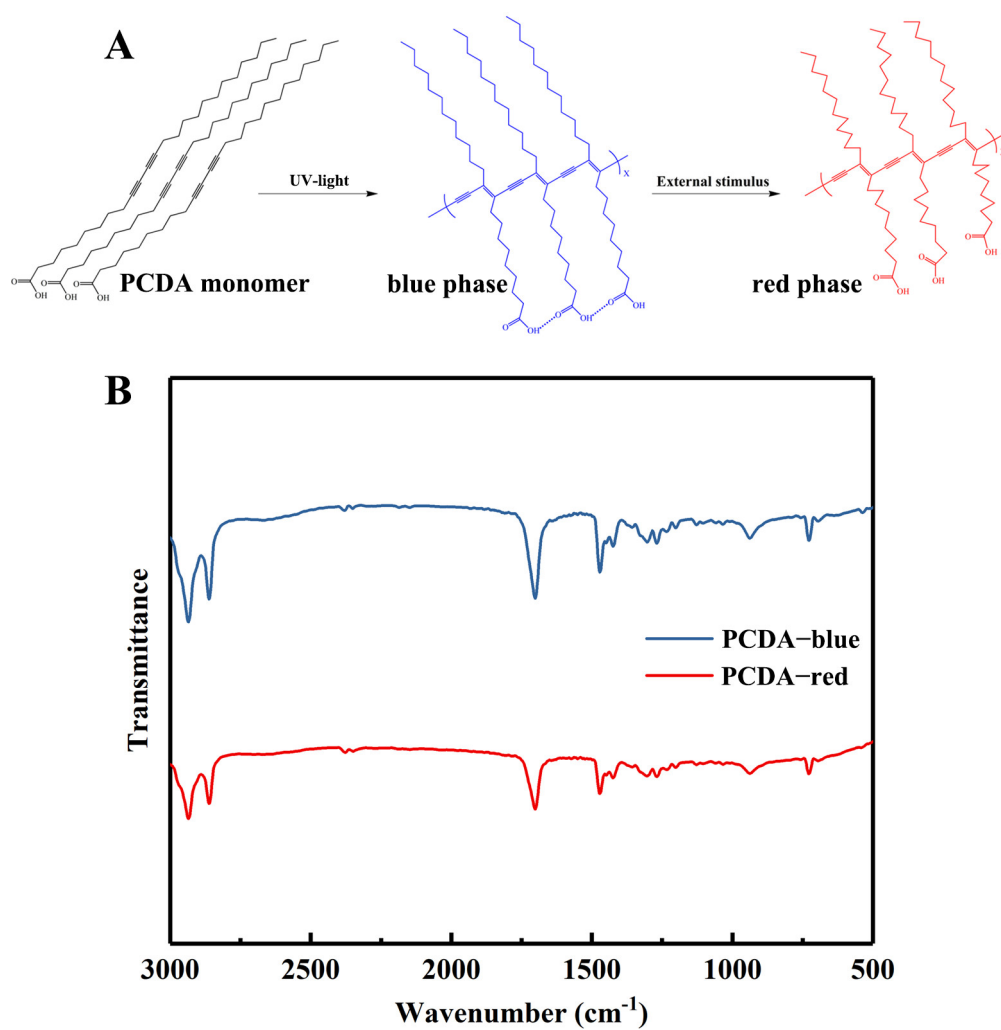

**Figure S1.** Chemical structures of PCDA at situations of monomer, blue phase and red phase (A), and the FT-IR curves of blue phase and red phase (B).

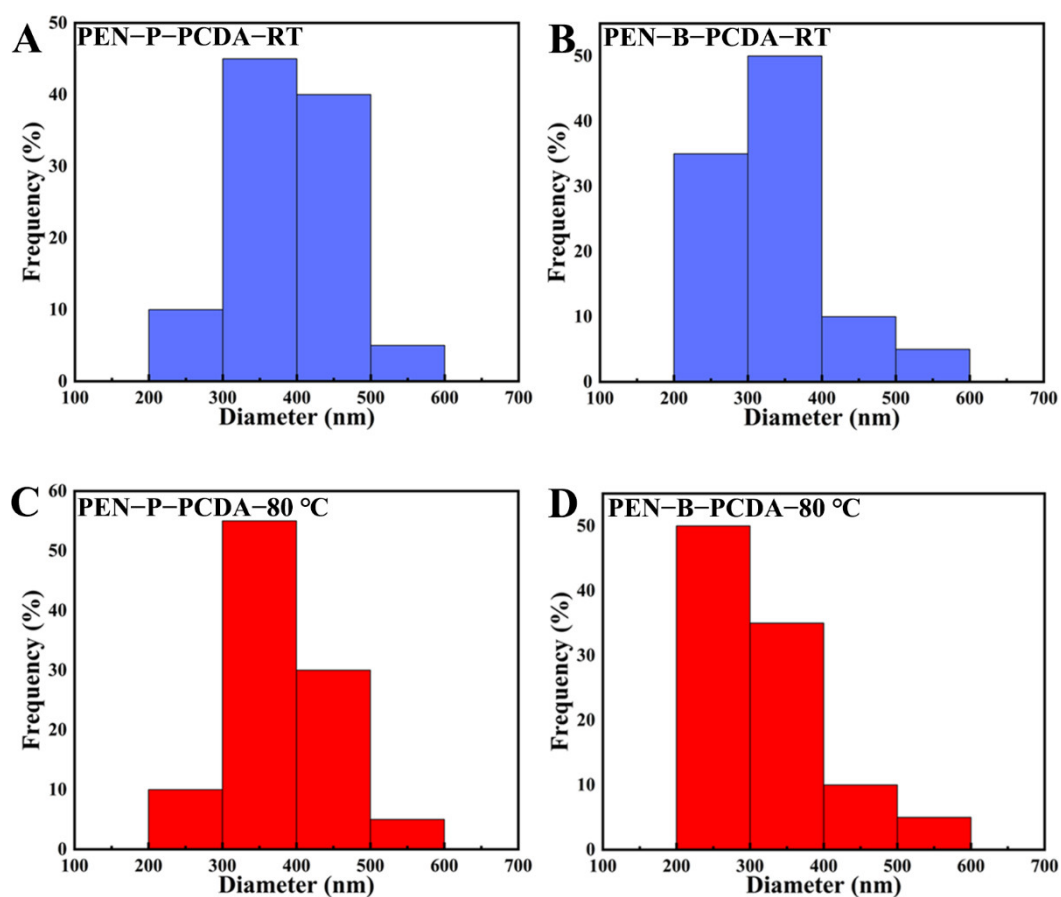

**Figure S2.** Statistical results of diameter of PEN-P-PCDA (A and C) and PEN-B-PCDA (B and D) nanofibrous membranes.
